# Supplementary material
Source: PubMed Central journal article supplement (PMC5983343)
Supplement: jci-128-96765-s055.pdf [file jci-128-96765-s055.pdf]

Supplementary Figure 1

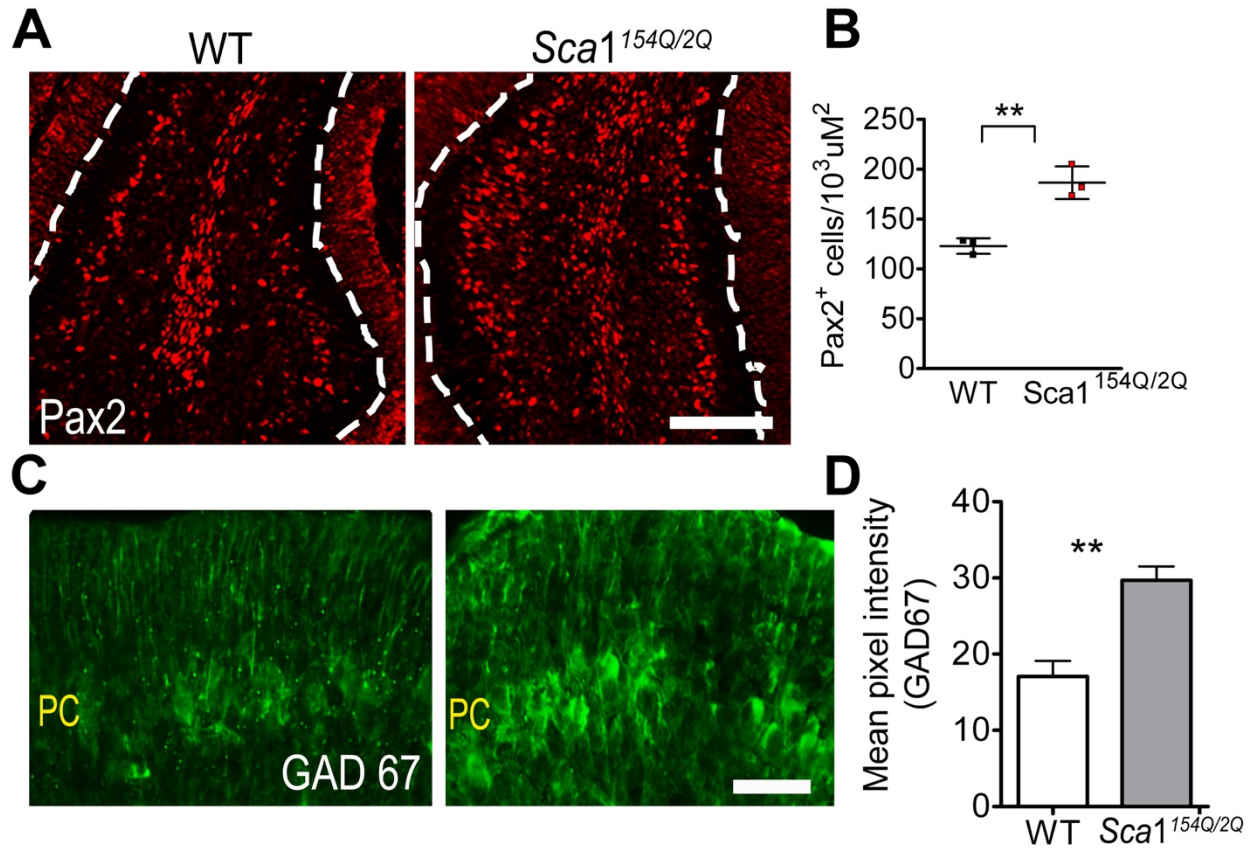

1078 **Supplementary Figure 1. SCA1 mice have more GABAergic progenitors than wild-type**

1079 **mice. (A and B) Increased Pax2 and (C and D) GAD67 staining in SCA1 mice compared to wild**

1080 **type littermates (P7). The area we counted for Pax2 cells is indicated by the dashed white line.**

1081 **Scale bar: 100μm; n=3 pairs of mice. \*\*P < 0.01, Two-tailed unpaired student t-test.**

1088  
1089

### Supplementary Figure 2

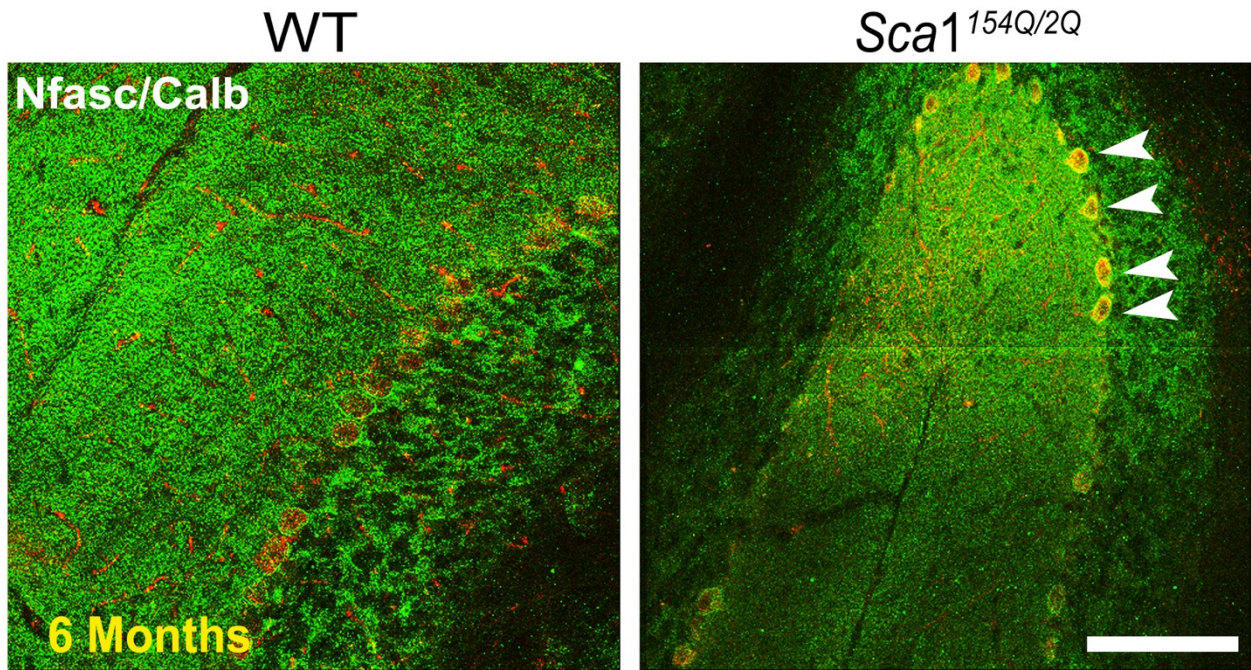

1090  
1091

1092 **Supplementary Figure 2. Upregulation of Nfasc in 6-month-old SCA1 mice.** Immunostaining  
1093 of 6-month-old cerebella with Nfasc (green) and calbindin (red) showed an upregulation of  
1094 Nfasc in SCA1 mice (visualized as yellow circumferential staining around PCs (arrowhead).  
1095 100µm; n=3 pairs of mice.

1096  
1097  
1098  
1099  
1100  
1101  
1102  
1103  
1104  
1105

1106  
1107

### Supplementary Figure 3

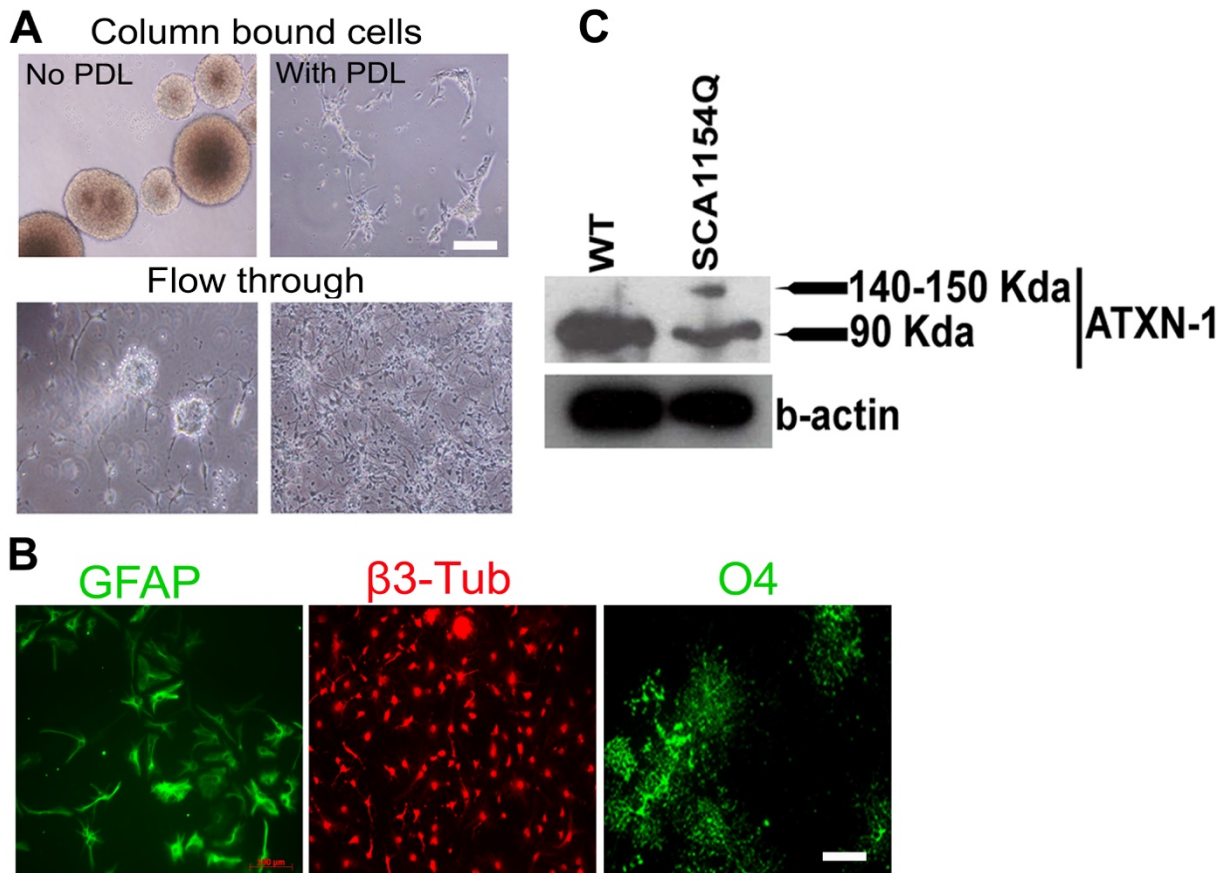

1108  
1109

1110 **Supplementary Figure 3. Cerebellar stem cell isolation, neurosphere formation and**  
1111 **differentiation.** (A) *Top panel:* Stem cells separated using Prominin-1 antibodies linked to  
1112 magnetic beads form floating neurospheres. Neurospheres form in the absence of Poly-D-lysine  
1113 (PDL) (since with PDL they attach and differentiate). *Bottom:* Cells that are unbound to the  
1114 column (flow through), which are primarily granular neurons, are unable to form neurospheres.  
1115 (B) Differentiated cultures derived from neurospheres were stained with glial (GFAP), neuronal  
1116 (Beta 3 tubulin) and oligodendrocyte (O4) markers. Four independent experiments were  
1117 performed. (C) Western blot from wild-type and SCA1 neurosphere protein extracts showing the  
1118 expression of wild-type and mutant ATXN1. See complete unedited blots in the supplemental  
1119 material. Scale bar: 100 $\mu$ m.

1120

1121  
1122

### Supplementary Figure 4

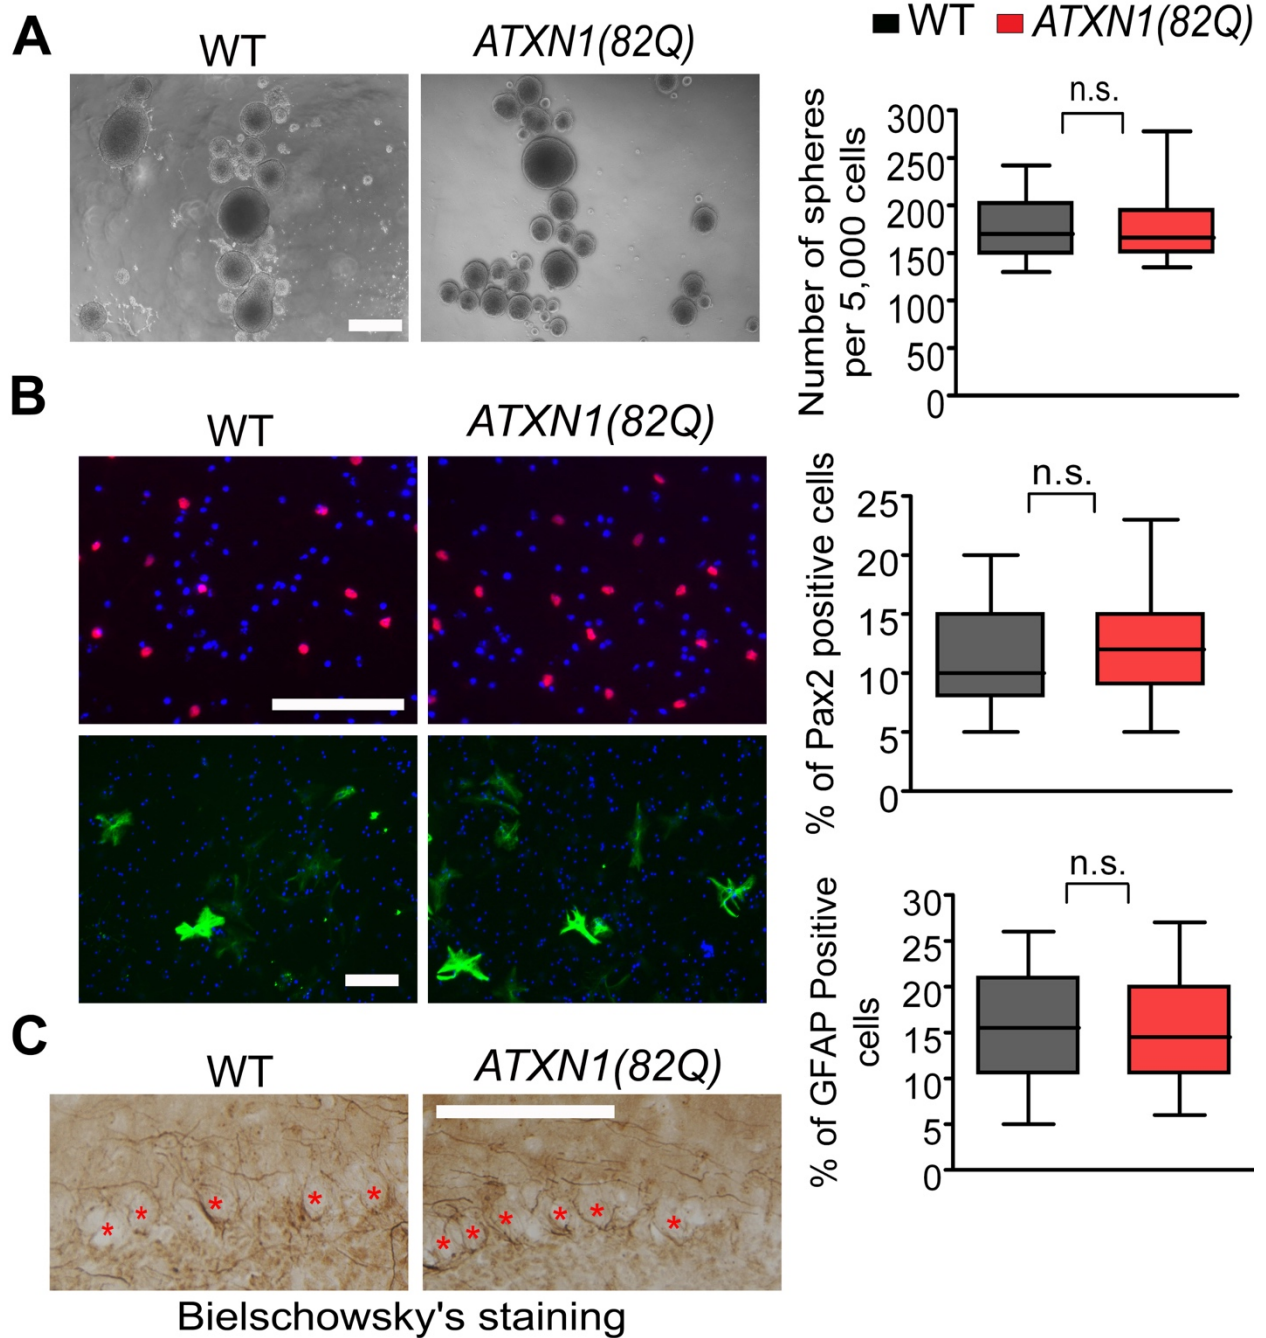

1123  
1124

1125 **Supplementary Figure 4. SCA1 transgenic mice (Purkinje cell-specific expression of ataxin-**  
1126 **1) mice show no cerebellar/basket cell phenotype. (A)** Neurospheres derived from isolated  
1127 prominin-1 stem cells of *ATXN1(82Q)* mice showed similar proliferative capacity as wild-type

1128 stem cells. Scale bar: 100µm; n=3 pairs of mice. **(B)** Differentiated cerebellar stem cells stained  
1129 for GABAergic (Pax2; scale bar 50µm) and glial markers (GFAP; scale bar 100µm). Both  
1130 *ATXNI(82Q)* stem cells and wild-type stem cells yielded the same number of Pax2- and GFAP-  
1131 positive cells. Scale bar 50µm; n=3 pairs of mice. **(C)** Representative images of Bielschowsky's  
1132 silver stained cerebella from SCA1 and wild-type mice. *ATXNI(82Q)* and wild-type cerebellum  
1133 showed normal densities of basket cell axonal processes around PC soma (Asterisk represent PC  
1134 soma). n.s.= no significance; two-tailed unpaired student t-test.

1135

1136

1137

1138

1139

1140

1141

1142

1143

1144

1145

1146

1147

1148

1149

1150

1151

1152

1153

1154

1155

1156  
1157

### Supplementary Figure 5

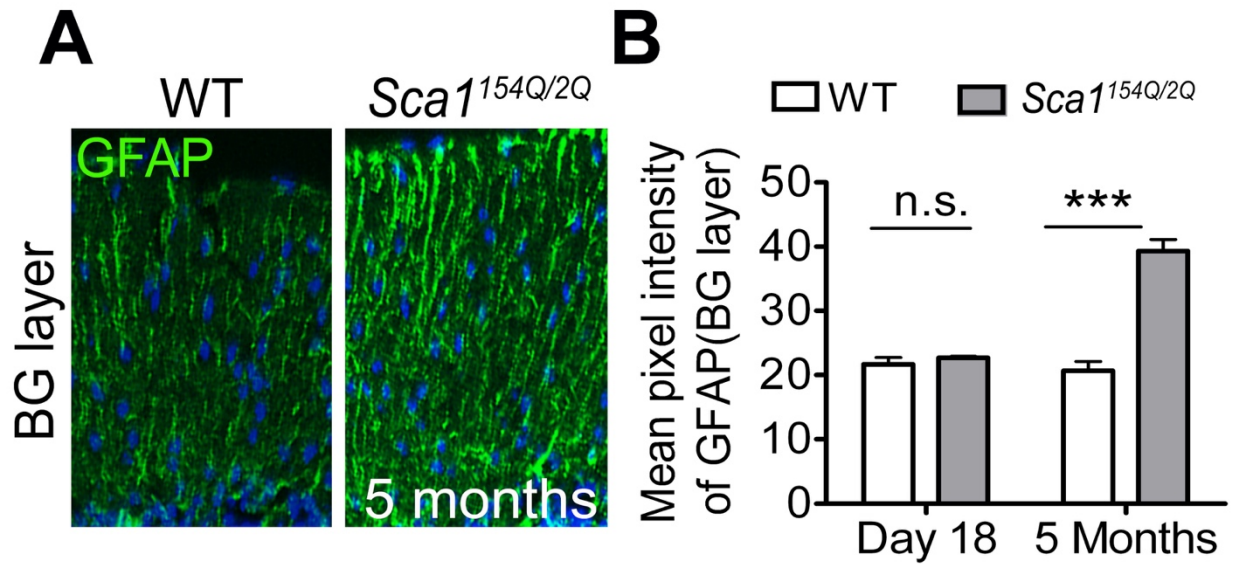

1158  
1159  
1160  
1161  
1162  
1163  
1164  
1165  
1166  
1167  
1168  
1169  
1170  
1171  
1172  
1173  
1174  
1175

**Supplementary Figure 5. SCA1 mice show reactive Bergmann glia.** (A and B) GFAP staining of Bergmann glia in the molecular layer revealed an age-dependent increase of the staining intensity in SCA1 mice as compared to wild-type controls; n=3 pairs of mice. \*\*\*P < 0.001, n.s.= no significance; two-tailed unpaired student t-test.

1176

### Supplementary Figure 6

1177

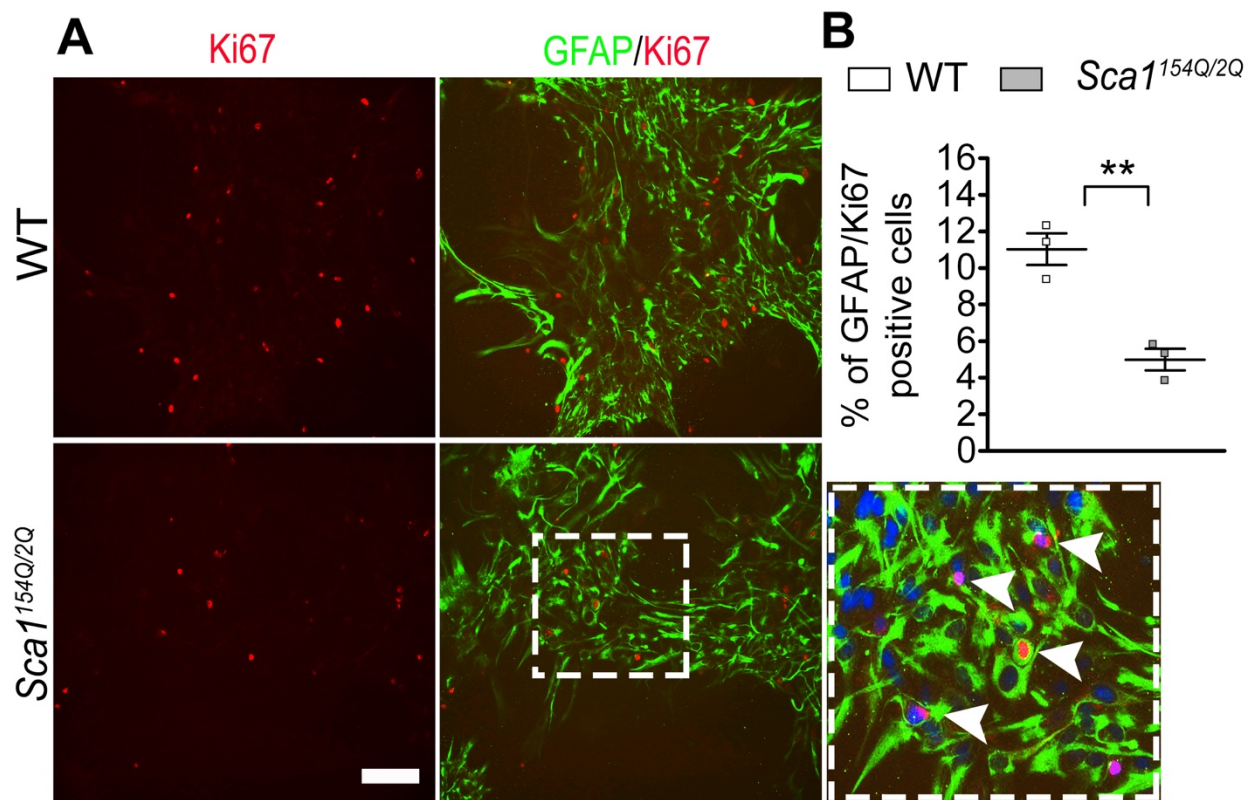

1178

1179

1180 **Supplementary Figure 6. Reduced proliferation of isolated astrocytes from *Sca1*<sup>154Q/2Q</sup> mice**

1181 **cerebella.** (A and B) Astrocytes isolated from SCA1 cerebella (P4) co-stained with proliferative

1182 marker Ki67 (red) and GFAP (green) showed lower proliferative capacity than wild-type

1183 controls. n=3 independent experiments. \*\*P < 0.01; two-tailed unpaired student t-test.

1184

1185

1186

1187

1188

1189

1190

1191

1192

## Supplementary Figure 7

1193

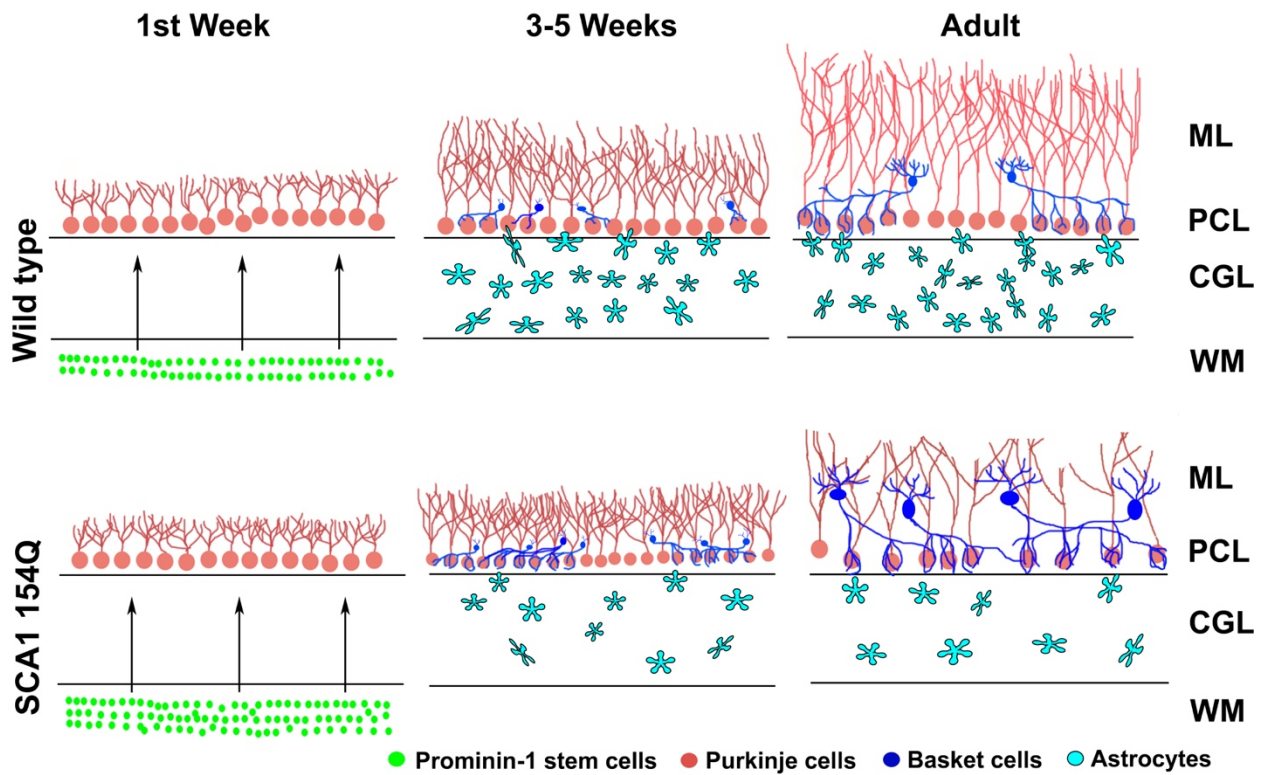

1194

1195

1196 **Supplementary Figure 7. Postnatal dysregulation of cerebellar stem cells in *Scal*<sup>154Q/2Q</sup>.**

1197 During the first week of life, there was abnormally high proliferation of prominin-1 cerebellar  
 1198 stem cells (green) in SCA1 mice. These mutant stem cells migrate into the molecular layer. By  
 1199 3-5 weeks, this larger-than-normal population of stem cells preferentially differentiated into  
 1200 GABAergic interneurons (blue) rather than the velate astrocyte lineage (green). This phenotype  
 1201 persisted into adulthood (6 months). (ML: molecular layer, PCL: Purkinje cell layer, CGL:  
 1202 Cerebellar granular layer, WM: White matter).

1203

1204

1205

1206

1207

1208



1209

### Supplementary Table 1

1210

| Age of Onset         | Age at Death | CAG Repeats |
|----------------------|--------------|-------------|
| Early-onset patients |              |             |
| 30                   | 47           | 28/47 (M)   |
| 20-22                | 54           | 35/50 (M)   |
| 27                   | 48           | 31/51 (M)   |
| 26                   | 36           | 34/49 (F)   |
| 28                   | 47           | 32/50 (F)   |
| 33                   | 63           | 33/41 (F)   |
| Late-onset patients  |              |             |
| 50                   | 64           | 30/44 (M)   |
| 50                   | 61           | 34/46 (M)   |
| 52                   | 65           | 31/42 (M)   |
| 41                   | 73           | 33/41 (F)   |
| 45                   | 66           | 31/46 (F)   |
| 55                   | 80           | 29/38 (F)   |

1211

1212 **Supplementary Table 1:** The age of onset, age at death, and the CAG repeat length for the 12  
1213 SCA1 patients used in this study.

1214

1215

1216

1217

1218

1219

1220

1221

1222

1223

1224

1225

1226

1227

1228

1229

1230

1231

1232

1233

## Supplementary Figure 8

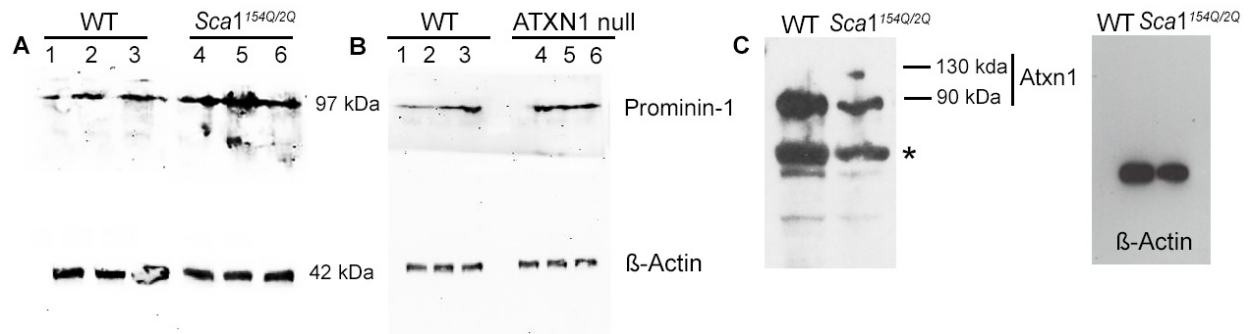

**Supplementary Figure 8:** Full length Western blot images

(A) Full length western blot image of Figure 1C (B) Full length western blot image of Figure 1G.

(C) Full length western blot image of supplementary figure 3C (Asterisk, nonspecific band).
